# Supplementary material for: Endo-lysosomal TRP mucolipin-1 channels trigger global ER Ca2+ release and Ca2+ influx
Source: Oxford University Press journal article supplement (doi:10.1242/jcs.190322), 2016-08-31
Supplement: jcs190322supp.pdf [file jcs190322supp.pdf]

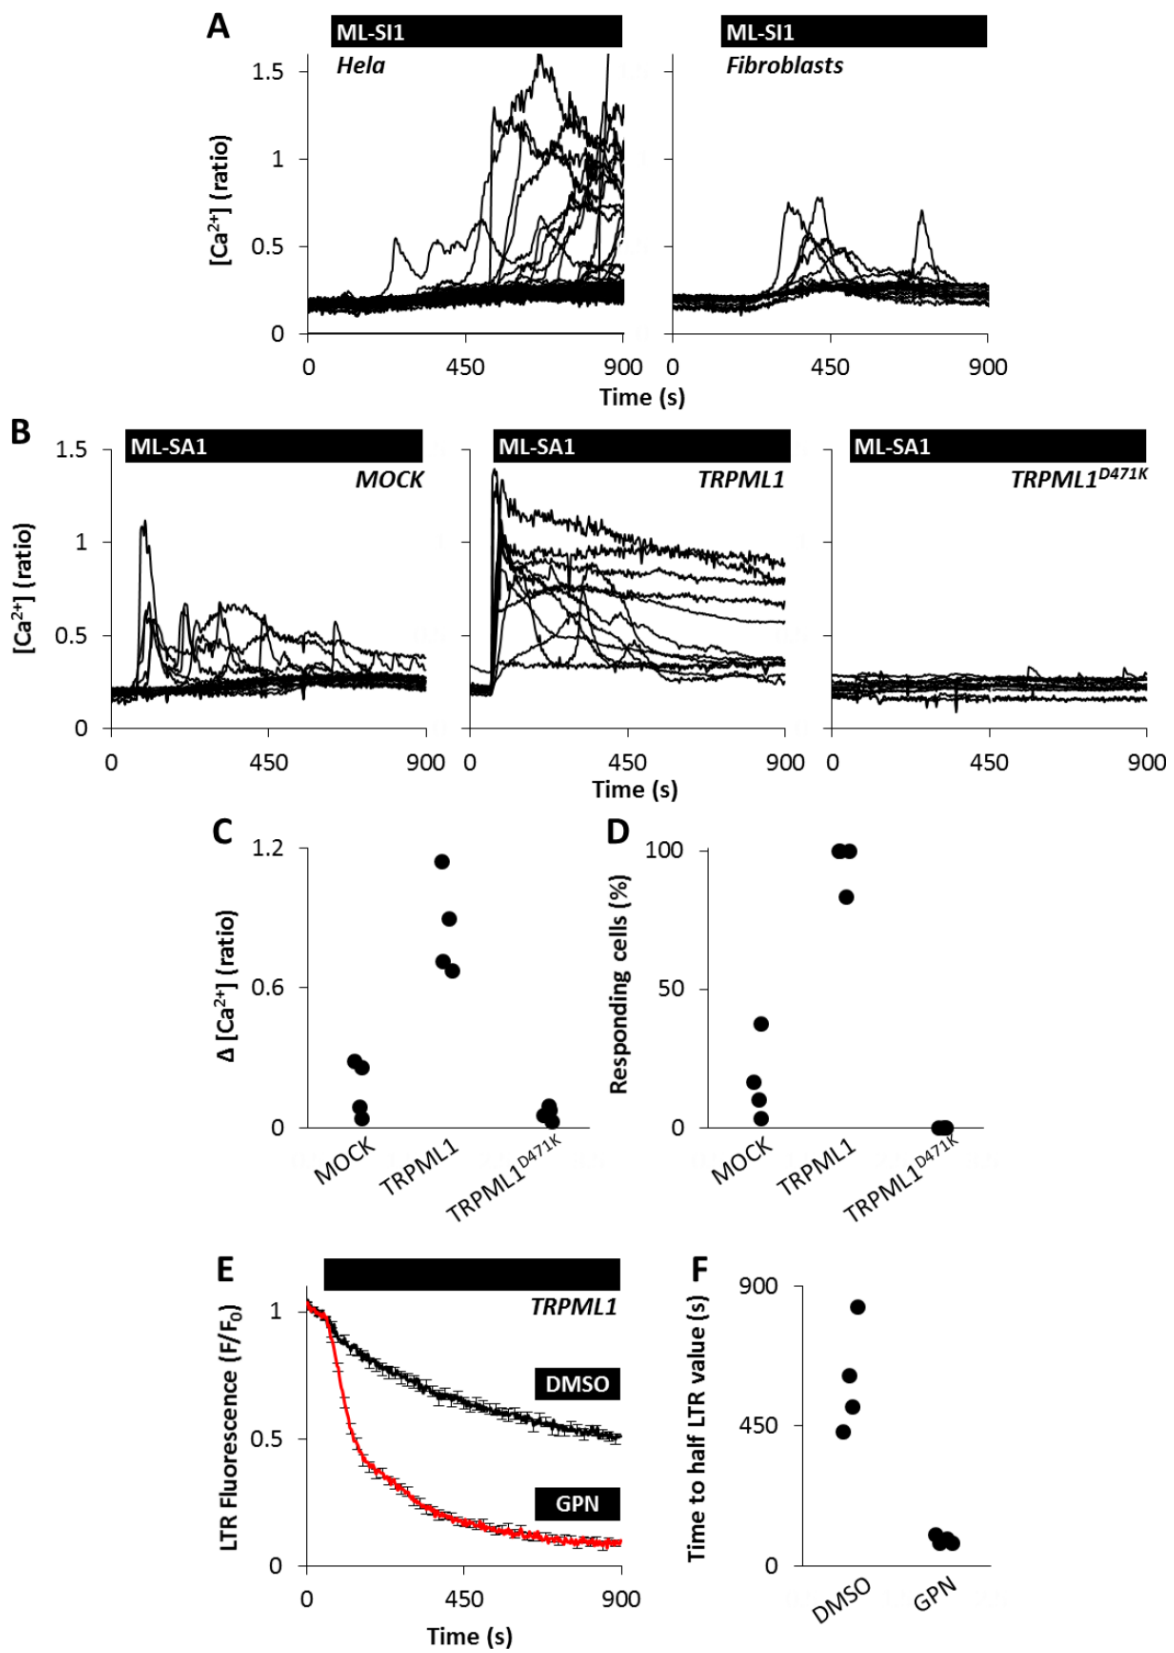

**Figure S1.** (A) The mucolipin inhibitor, ML-SI1 elevates cytosolic  $\text{Ca}^{2+}$  levels. Cytosolic  $\text{Ca}^{2+}$  levels of HeLa cells and fibroblasts stimulated with 20  $\mu\text{M}$  ML-SI1. (B-D) Agonist-evoked  $\text{Ca}^{2+}$  signals require TRPML1. (C) Cytosolic  $\text{Ca}^{2+}$  levels of individual mock transfected fibroblasts or fibroblasts expressing TRPML1 or TRPML1<sup>D471K</sup> stimulated with 20  $\mu\text{M}$  ML-SA1. (C-D) Summary data (12-97 cells). (E-F) GPN compromises lysosome integrity. (E) LysoTracker<sup>®</sup> red fluorescence levels of TRPML1 expressing HeLa cells stimulated with vehicle (0.1 % DMSO) or 200 $\mu\text{M}$  GPN. (F) Summary data quantifying the time taken to achieve half-maximal loss of fluorescence (87-108 cells).

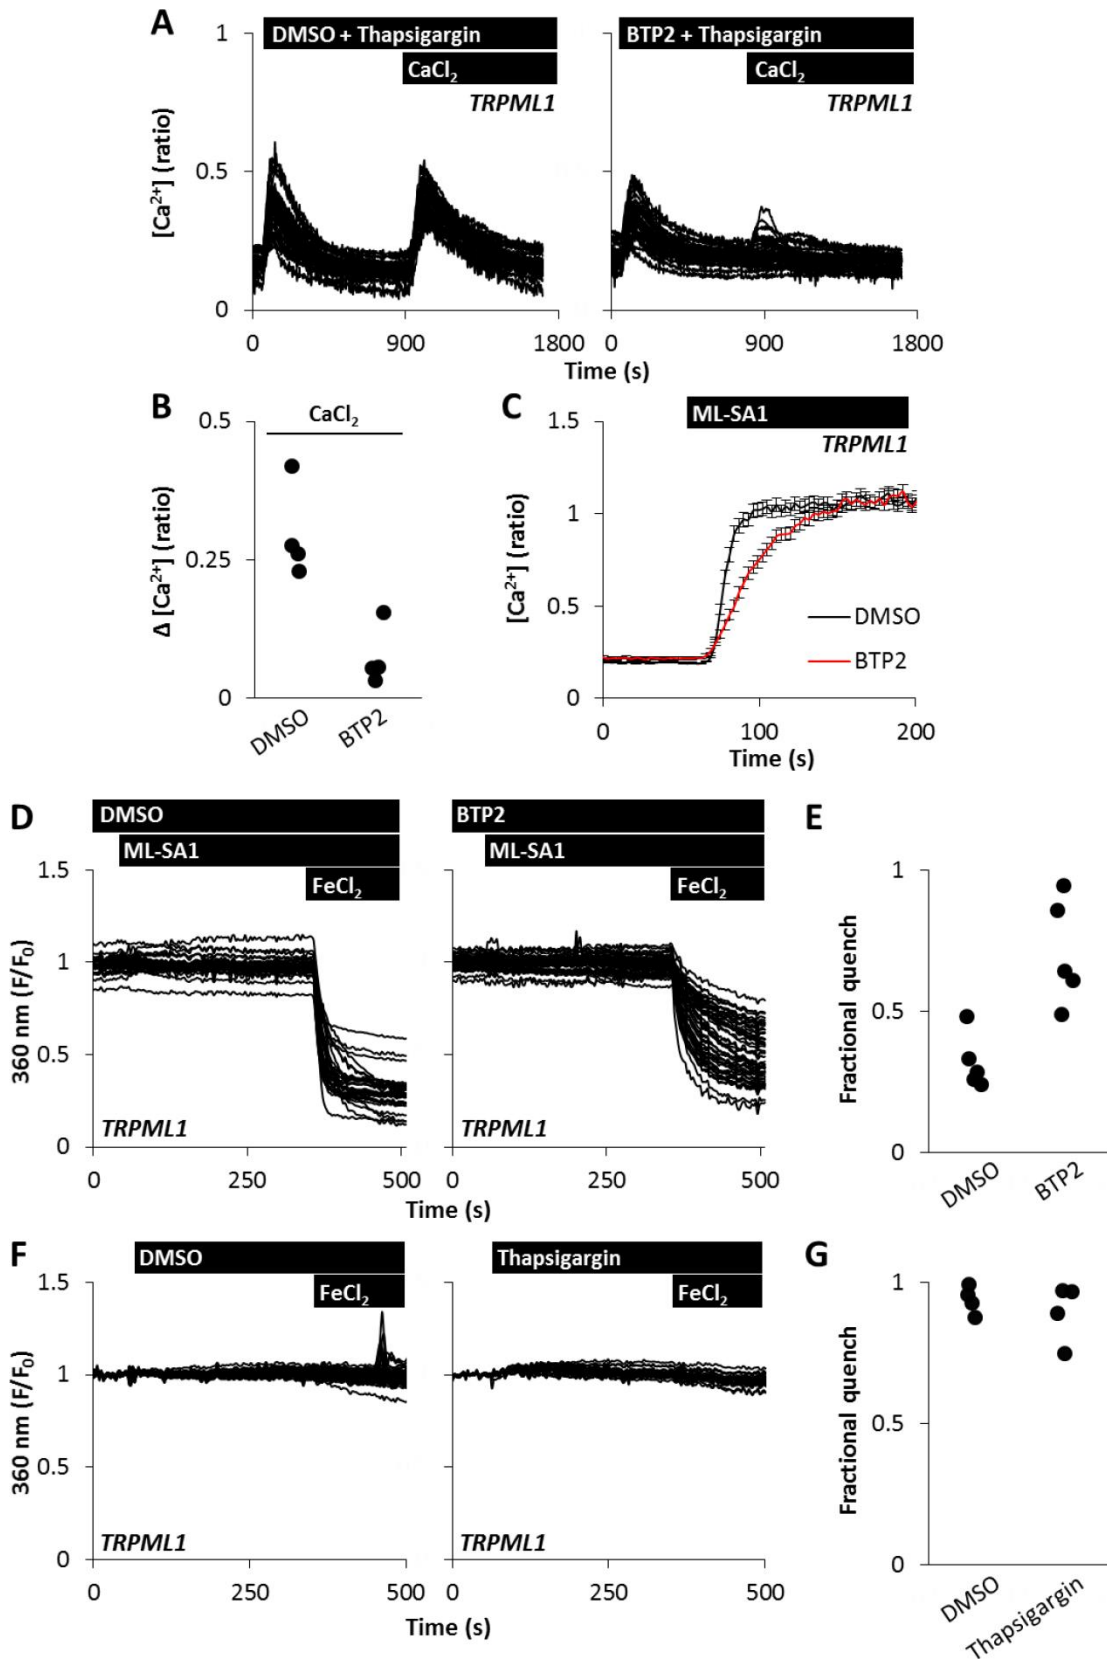

**Figure S2.** (A-B) BTP2 inhibits store-operated  $\text{Ca}^{2+}$  entry. (A) Cytosolic  $\text{Ca}^{2+}$  levels of TRPML1-expressing HeLa cells in nominally  $\text{Ca}^{2+}$ -free medium sequentially stimulated with 1  $\mu\text{M}$  thapsigargin and 2mM  $\text{CaCl}_2$  in the presence of vehicle (0.1 % DMSO) or 20  $\mu\text{M}$  BTP2. (B) Summary data (111-117 cells). (C). BTP2 slows ML-SA1-evoked  $\text{Ca}^{2+}$  signals. Cytosolic  $\text{Ca}^{2+}$  levels of TRPML1-expressing HeLa cells (presented as mean  $\pm$  s.e.m. of 120-121 cells, n=3) stimulated with 20  $\mu\text{M}$  ML-SA1 in the presence of vehicle (0.1 % DMSO) or 20  $\mu\text{M}$  BTP2. (D-E) BTP2 slows ML-SA1-evoked  $\text{Fe}^{2+}$ -entry. (D) Quench of Fura-2 fluorescence in HeLa cells expressing TRPML1 stimulated with 20  $\mu\text{M}$  ML-SA1 and then 1 mM  $\text{FeCl}_2$ . Experiments were performed in nominally  $\text{Ca}^{2+}$ -free medium either in the presence of vehicle (0.1 % DMSO) or 20  $\mu\text{M}$  BTP2. (E) Summary data (124-144 cells). (F-G) Depletion of ER  $\text{Ca}^{2+}$  stores does not evoke  $\text{Fe}^{2+}$  entry. (F) Quench of Fura-2 fluorescence in HeLa cells expressing TRPML1 stimulated with 1 mM  $\text{FeCl}_2$  in the presence of vehicle (0.1 % DMSO) or 1  $\mu\text{M}$  thapsigargin. (G) Summary data (84-130 cells).

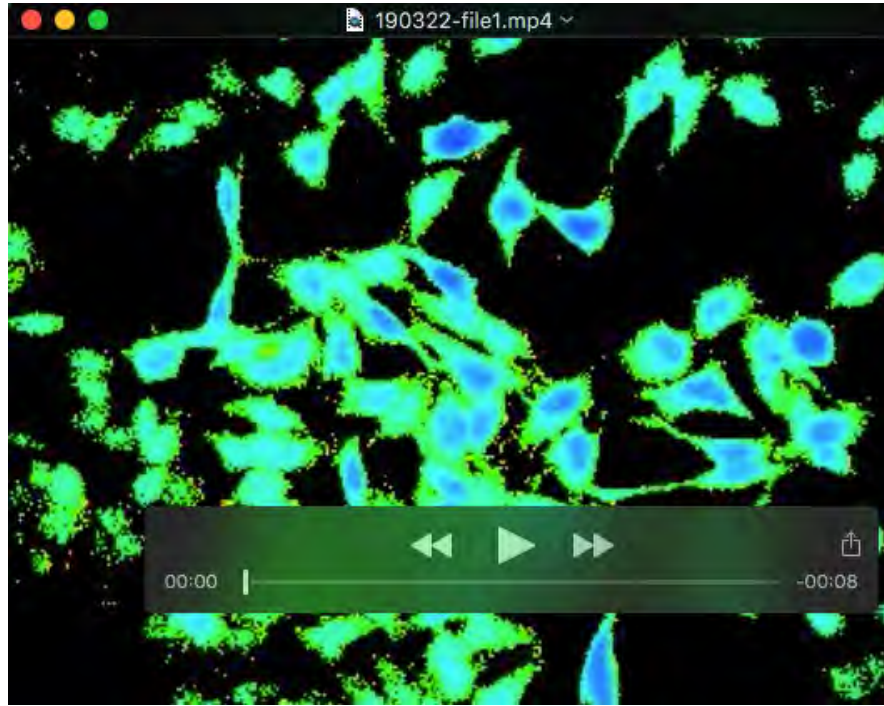

**Movie S1. Activation of TRPML evokes global  $\text{Ca}^{2+}$  signals in HeLa cells.** Effect of 20  $\mu\text{M}$  ML-SA1 on cytosolic  $\text{Ca}^{2+}$  levels of Fura-2 loaded HeLa cells. Images were acquired every 3 s and played back at a rate of 40 frames per second. Warmer colours represent an increase in Fura-2 fluorescence ratio which is proportional to  $\text{Ca}^{2+}$  concentration.

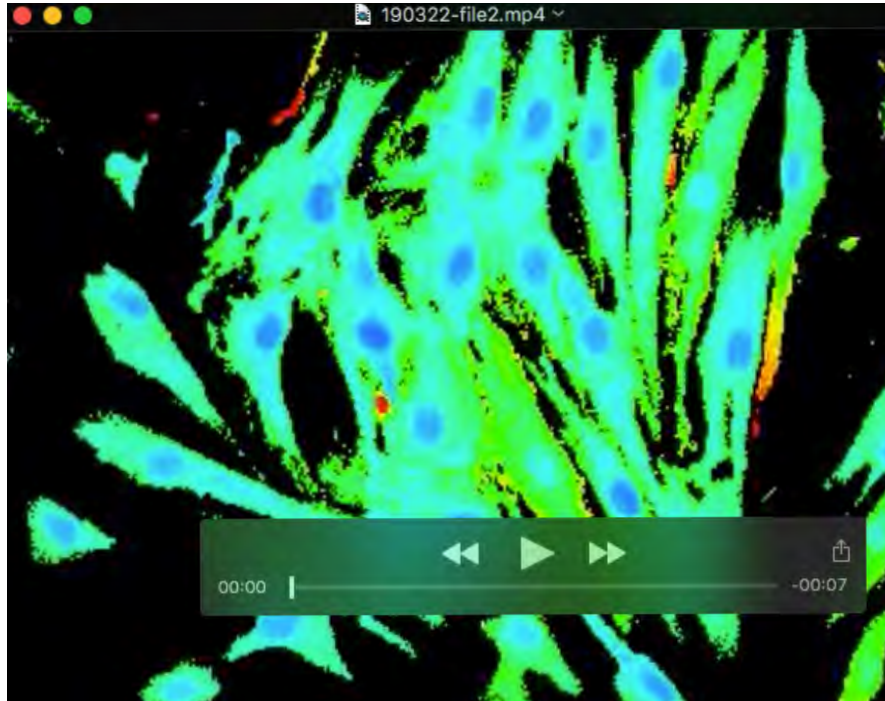

**Movie S2. Activation of TRPML evokes global  $\text{Ca}^{2+}$  signals in fibroblasts.** Effect of 20  $\mu\text{M}$  ML-SA1 on cytosolic  $\text{Ca}^{2+}$  levels of Fura-2 loaded fibroblasts. Images were acquired every 3 s and played back at a rate of 40 frames per second. Warmer colours represent an increase in Fura-2 fluorescence ratio which is proportional to  $\text{Ca}^{2+}$  concentration.
